# Supplementary material
Source: PubMed Central journal article supplement (PMC6554736)

RE-AIM Evaluation of CoMPAdRE

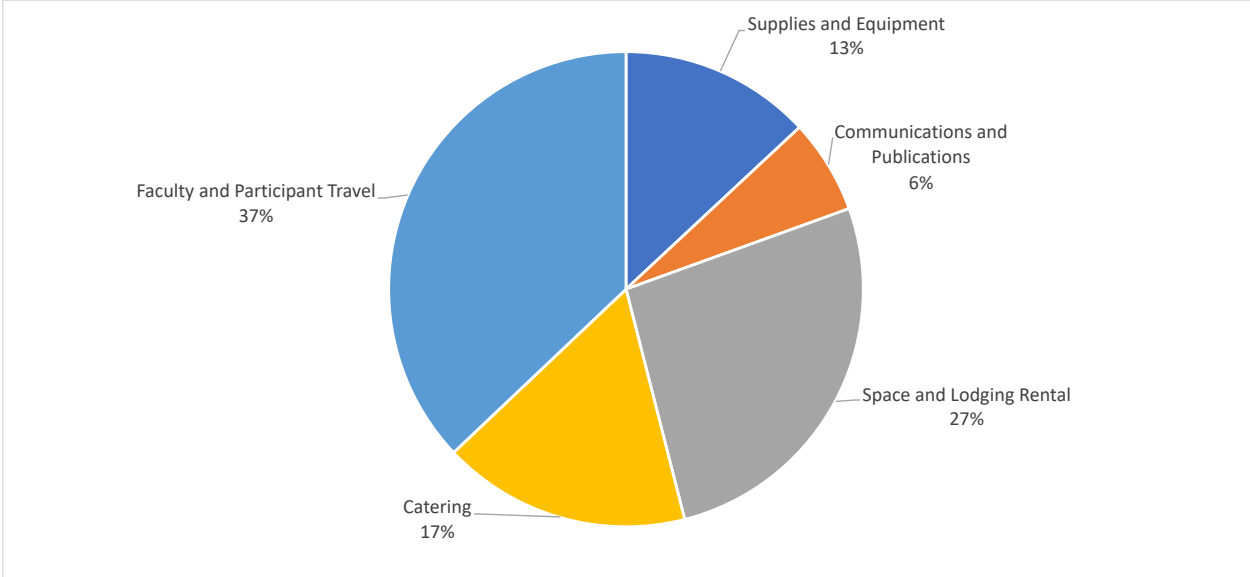

Supplement: NIHMS1009516-supplement-3.pdf [file NIHMS1009516-supplement-3.pdf]
